# Supplementary material
Source: ML conference proceedings conference paper supplement (https://aclanthology.org/2025.woah-1.31)

# ADU Classifier

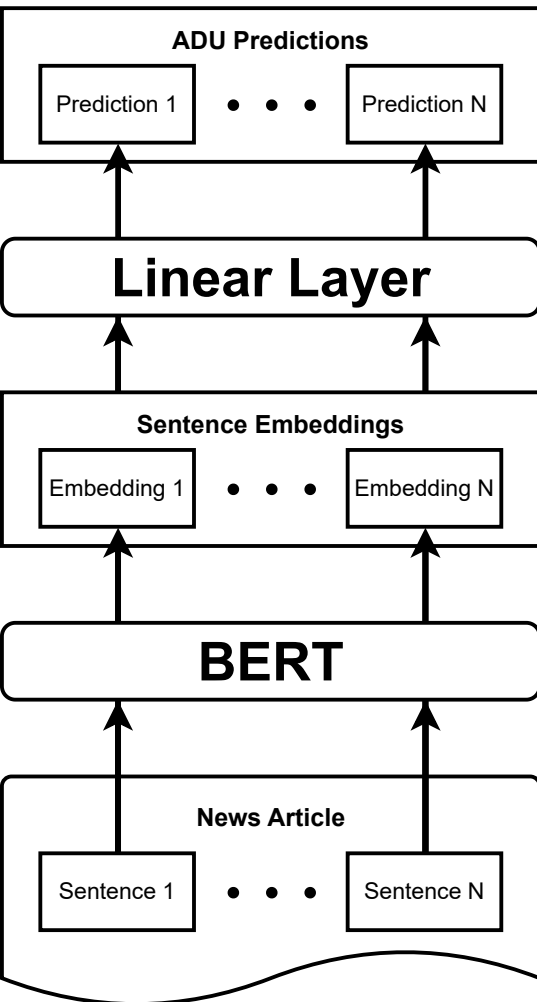

# Fake News Detector

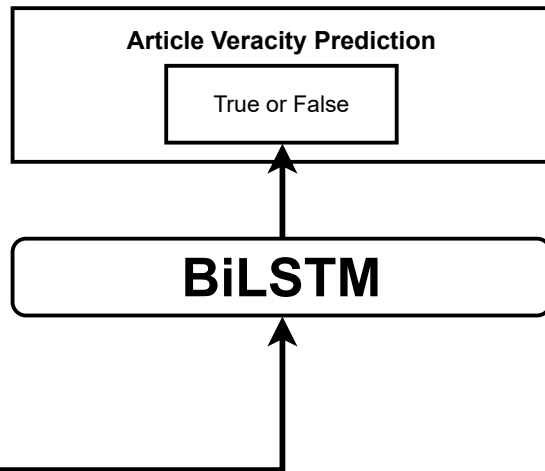

Supplement: SupplementaryMaterial [file model_diagram.pdf › Argumentation in Fake News/figures/model_diagram.pdf]
